# Supplementary material for: LGHAP v2: A global gap-free aerosol optical depth and PM 2.5 concentration dataset since 2000 derived via big earth data analytics
Source: Copernicus journal article supplement (doi:10.5194/essd-2023-519), 2024-01-05
Supplement: Supplementary file 1 [file essd-2023-519-supplement.pdf]

1 **Supporting information**

2 **LGHAP v2: A global gap-free aerosol optical depth and PM<sub>2.5</sub> concentration**  
3 **dataset since 2000 derived via big earth data analytics**

4 Kaixu Bai<sup>1,2</sup>, Ke Li<sup>1</sup>, Liuqing Shao<sup>1</sup>, Xinran Li<sup>1</sup>, Chaoshun Liu<sup>1</sup>, Zhengqiang Li<sup>3</sup>, Mingliang Ma<sup>4</sup>, Di  
5 Han<sup>1</sup>, Yibing Sun<sup>1</sup>, Zhe Zheng<sup>1</sup>, Ruijie Li<sup>1</sup>, Ni-Bin Chang<sup>5</sup>, Jianping Guo<sup>6</sup>

6 <sup>1</sup>Key Laboratory of Geographic Information Science (Ministry of Education), School of Geographic Sciences, East China  
7 Normal University, Shanghai 200241, China

8 <sup>2</sup>Institute of Eco-Chongming, 20 Cuiniao Rd., Chongming, Shanghai 202162, China

9 <sup>3</sup>State Environmental Protection Key Laboratory of Satellite Remote Sensing, Aerospace Information Research Institute,  
10 Chinese Academy of Sciences, Beijing 100101, China

11 <sup>4</sup>School of Surveying and Geo-Informatics, Shandong Jianzhu University, Jinan 250101, China

12 <sup>5</sup>Department of Civil, Environmental, and Construction Engineering, University of Central Florida, Orlando, FL, USA

13 <sup>6</sup>State Key Laboratory of Severe Weather, Chinese Academy of Meteorological Sciences, Beijing, China

14 *Correspondence to:* Kaixu Bai (kxbai@geo.ecnu.edu.cn) and Jianping Guo (jpguocams@gmail.com)

## 15 Text S1. Multisource data homogenization

16 Given excessive missing values in satellite-based AOD retrievals, it is promising to improve the gap-filling accuracy by  
17 increasing data abundance via an integration of external observations. Benefiting from the powerful approximation capacity  
18 of machine learning algorithms (i.e., random forest in our study), a set of machine-learned regression models were established  
19 to generate MODIS-like AOD estimates from diverse data sources, aiming at providing critical prior information to facilitate  
20 AOD gap-filling, especially over regions with massive data voids.  $AOD_{Terra}$  observations were hereby deemed the response  
21 variable while AOD data from other satellites, MERRA-2 AOD simulations, even in-situ air quality measurements, were used  
22 respectively as the critical predictor other than meteorological and geographic factors for AOD prediction. The data  
23 homogenization models can be expressed as follows.

$$24 \quad AOD_{Terra} \sim RF(AQ, MET, AER, LULC, DEM, NDVI, POP, month) \quad (1)$$

25 where  $AQ$  refers to AOD data other than  $AOD_{Terra}$  and in situ air quality measurements such as atmospheric visibility and  
26 concentrations of major air pollutants that are indicative of regional air quality.  $MET$ ,  $AER$ ,  $LULC$ ,  $DEM$ ,  $NDVI$ ,  $POP$ , and  
27  $month$  refer to meteorological variables, numerical aerosol simulations, land use and land cover, elevation, vegetation cover,  
28 population, and month identifier respectively.

29 By taking advantage of these data-specific machine learning models, gridded AOD products from other satellites and  
30 numeric models were harmonized to resemble  $AOD_{Terra}$  by correcting for both the scaling effect (varied spatial resolution)  
31 and cross-sensor biases. More importantly, virtual AOD observations were derived from in situ air quality measurements,  
32 providing additional AOD prior information to facilitate AOD gap-filling, especially over regions without satellite-based AOD  
33 retrievals. This homogenization approach greatly favors the assimilation of multisensory AODs and heterogenous air quality  
34 data (Bai et al., 2022a; Li et al., 2022a).

## 35 Text S2. Scene-aware ensemble learning graph attention network (SeGAT) for global PM<sub>2.5</sub> mapping

36 To accommodate global big earth observation data and to account for spatial representativeness issue of model  
37 extrapolation, we developed a novel scene-aware ensemble learning graph attention network (SeGAT) model to fulfill global  
38 PM<sub>2.5</sub> concentration mapping. The workflow of this method was illustrated in Figure S4. Differing from previous data-driven  
39 models which were established using either all available data (global model) or regional observations (regional model), the  
40 SeGAT model was dedicated to solving the scaling problem in large scale modeling practices (e.g., global PM<sub>2.5</sub> modeling in  
41 this study), avoiding to answer the open questions at what scale the data-driven model should be established and/or how to  
42 determine the boundary size (city, province, national, and global) for selecting proper training samples. In the following, we  
43 briefly introduced the technical flows of the SeGAT model.

44 Firstly, we proposed to establish PM<sub>2.5</sub> estimation models at each individual monitoring site using random forest given its  
45 good approximation capacity. Specifically, ground measured PM<sub>2.5</sub> concentrations were used as the learning target while the  
46 collocated AOD from the LGHAP v2 dataset were used as the proxy variable along with a set of explainable variables. The  
47 site-specific PM<sub>2.5</sub> estimation models can be formulated as:

$$48 \quad PM_{2.5} \sim RF(AOD, MET, AER, LULC, DEM, NDVI, POP, month) \quad (1)$$

49 where AOD refers to the gap-free AOD grids from LGHAP v2 dataset. *MET*, *AER*, *LULC*, *DEM*, *NDVI*, *POP*, and *month*  
50 denote meteorological variables, numerical aerosol diagnostics, land use and land cover, elevation, vegetation index,  
51 population, and month of the year, respectively. Therefore, tens of thousands of regional PM<sub>2.5</sub> concentration estimation models  
52 were established at the local scale across the globe.

53 Secondly, an adjacency matrix was calculated between each footprint of gap-filled AOD<sub>Terra</sub> and monitoring sites overlaid  
54 grids in reference to nine distinct features indicating the scene attribute of each grid cell, i.e., *latitude*, *longitude*, *AOD*, *relative*  
55 *humidity*, *air temperature*, *NDVI*, *elevation*, *population*, and *land use and land cover ratio*. Specifically, the high-dimension  
56 Euclidian distance was calculated between grids on the basis of these nine features after normalization. The assumption is that  
57 the nonlinear interactions between AOD and PM<sub>2.5</sub> may comply with a similar relationship over scenes with comparable  
58 ambient environment. Therefore, PM<sub>2.5</sub> concentration over one grid could be estimated from models trained over sites with  
59 scene features similar to this given grid.

60 Thirdly, a graph attention network was then employed to integrate multiple PM<sub>2.5</sub> estimates derived from a set of site-  
61 specific models with similar scene features. Specifically, PM<sub>2.5</sub> estimates from 32 models with similar scene features were  
62 used as the learning input, while the normalized attribute differences were used as the weights in the adjacency matrix and the  
63 testing accuracy of each random forest model was used as the node bias. During the graph network training, the model utilized  
64 attention operations to discern crucial associations between scene attributes, and the model was continuously optimized by  
65 adjusting graph structures and incorporating residual connections. A global pooling layer was then employed to amalgamate  
66 contextual data from all nodes.

67 Distinct from other learning models, as a hybrid model, the proposed SeGAT model not only takes advantage of powerful  
68 approximation capacity of random forest but also accounts for spatial representativeness of each data-driven model. More  
69 importantly, the SeGAT model is capable of predicting PM<sub>2.5</sub> concentration even over regions without monitoring sites.

**Table S1.** Data accuracy of raw AOD datasets used for generating global gap-free LGHAP v2 AOD dataset by comparing against AOD observations from AERONET during 2000–2021.

| Dataset                                                 | Region        | Mean AOD | Number of monitors | Number of samples | R    | RMSE | Bias  | Below EE (%) | Within EE (%) | Above EE (%) |
|---------------------------------------------------------|---------------|----------|--------------------|-------------------|------|------|-------|--------------|---------------|--------------|
| MCD19A2 (Aqua)                                          | Global        | 0.17     | 1335               | 341254            | 0.88 | 0.11 | 0.01  | 12.11        | 75.45         | 12.44        |
|                                                         | North America | 0.11     | 433                | 94531             | 0.87 | 0.07 | -0.01 | 3.72         | 82.54         | 13.74        |
|                                                         | South America | 0.11     | 81                 | 20537             | 0.93 | 0.07 | 0.00  | 9.46         | 77.61         | 12.93        |
|                                                         | Europe        | 0.11     | 208                | 83773             | 0.81 | 0.06 | 0.02  | 10.69        | 83.42         | 5.90         |
|                                                         | Asia          | 0.32     | 321                | 79146             | 0.90 | 0.14 | 0.00  | 15.53        | 67.80         | 16.67        |
|                                                         | Africa        | 0.21     | 110                | 40867             | 0.78 | 0.19 | 0.05  | 29.20        | 56.75         | 14.05        |
|                                                         | Australia     | 0.09     | 28                 | 10272             | 0.79 | 0.06 | -0.02 | 4.81         | 76.71         | 18.48        |
| VIIRS/NPP                                               | Global        | 0.19     | 1335               | 204573            | 0.90 | 0.11 | -0.01 | 9.68         | 75.58         | 14.73        |
|                                                         | North America | 0.12     | 433                | 69371             | 0.86 | 0.12 | -0.01 | 6.76         | 81.61         | 11.63        |
|                                                         | South America | 0.08     | 81                 | 15326             | 0.81 | 0.07 | 0.03  | 18.93        | 75.61         | 5.46         |
|                                                         | Europe        | 0.13     | 208                | 45874             | 0.82 | 0.06 | -0.01 | 4.42         | 83.62         | 11.96        |
|                                                         | Asia          | 0.38     | 321                | 42570             | 0.91 | 0.15 | -0.02 | 11.88        | 67.43         | 20.69        |
|                                                         | Africa        | 0.23     | 110                | 25183             | 0.89 | 0.13 | 0.00  | 17.00        | 61.47         | 21.53        |
|                                                         | Australia     | 0.11     | 28                 | 4409              | 0.58 | 0.11 | -0.04 | 3.38         | 65.28         | 31.34        |
| MISR/Terra                                              | Global        | 0.19     | 1335               | 79125             | 0.87 | 0.11 | 0.00  | 5.24         | 81.72         | 13.04        |
|                                                         | North America | 0.13     | 433                | 20839             | 0.79 | 0.09 | -0.02 | 1.76         | 82.12         | 16.13        |
|                                                         | South America | 0.13     | 81                 | 4526              | 0.89 | 0.12 | 0.00  | 4.20         | 87.38         | 8.42         |
|                                                         | Europe        | 0.14     | 208                | 18630             | 0.87 | 0.05 | 0.00  | 2.59         | 90.85         | 6.56         |
|                                                         | Asia          | 0.31     | 321                | 15792             | 0.85 | 0.18 | 0.02  | 12.61        | 72.44         | 14.96        |
|                                                         | Africa        | 0.25     | 110                | 10003             | 0.87 | 0.14 | 0.00  | 7.56         | 73.78         | 18.66        |
|                                                         | Australia     | 0.11     | 28                 | 2241              | 0.76 | 0.07 | -0.03 | 1.56         | 73.05         | 25.39        |
| PARASOL/<br>POLDER                                      | Global        | 0.30     | 1335               | 72120             | 0.86 | 0.18 | -0.08 | 4.02         | 54.12         | 41.87        |
|                                                         | North America | 0.21     | 433                | 15849             | 0.68 | 0.16 | -0.10 | 1.54         | 45.09         | 53.37        |
|                                                         | South America | 0.25     | 81                 | 3235              | 0.95 | 0.16 | -0.08 | 1.58         | 54.37         | 44.05        |
|                                                         | Europe        | 0.20     | 208                | 19960             | 0.72 | 0.12 | -0.05 | 3.47         | 63.65         | 32.88        |
|                                                         | Asia          | 0.51     | 321                | 17651             | 0.85 | 0.24 | -0.11 | 6.10         | 46.07         | 47.83        |
|                                                         | Africa        | 0.39     | 110                | 8108              | 0.83 | 0.20 | -0.07 | 7.24         | 56.18         | 36.58        |
|                                                         | Australia     | 0.10     | 28                 | 2171              | 0.69 | 0.07 | -0.03 | 1.89         | 71.44         | 26.67        |
| AATSR/<br>Envisat                                       | Global        | 0.19     | 1335               | 30870             | 0.83 | 0.11 | 0.00  | 10.05        | 76.91         | 13.04        |
|                                                         | North America | 0.12     | 433                | 7828              | 0.87 | 0.06 | 0.00  | 5.81         | 86.89         | 7.29         |
|                                                         | South America | 0.12     | 81                 | 1578              | 0.75 | 0.10 | 0.01  | 14.32        | 71.55         | 14.13        |
|                                                         | Europe        | 0.14     | 208                | 8139              | 0.84 | 0.06 | 0.01  | 9.23         | 85.17         | 5.60         |
|                                                         | Asia          | 0.31     | 321                | 5358              | 0.79 | 0.15 | 0.00  | 14.73        | 64.11         | 21.16        |
|                                                         | Africa        | 0.30     | 110                | 3672              | 0.79 | 0.20 | 0.00  | 18.57        | 61.55         | 19.88        |
|                                                         | Australia     | 0.13     | 28                 | 997               | 0.36 | 0.13 | -0.05 | 4.01         | 61.79         | 34.20        |
| SeaWiFS/<br>OrbView-2                                   | Global        | 0.21     | 1335               | 21643             | 0.88 | 0.12 | 0.00  | 12.34        | 70.64         | 17.02        |
|                                                         | North America | 0.12     | 433                | 4885              | 0.73 | 0.08 | -0.02 | 5.69         | 75.78         | 18.53        |
|                                                         | South America | 0.17     | 81                 | 1158              | 0.93 | 0.13 | 0.03  | 25.47        | 68.83         | 5.70         |
|                                                         | Europe        | 0.16     | 208                | 3949              | 0.79 | 0.07 | 0.00  | 8.38         | 77.67         | 13.95        |
|                                                         | Asia          | 0.32     | 321                | 3972              | 0.77 | 0.15 | 0.00  | 20.62        | 58.26         | 21.12        |
|                                                         | Africa        | 0.34     | 110                | 3230              | 0.90 | 0.16 | 0.03  | 22.57        | 59.66         | 17.77        |
|                                                         | Australia     | 0.07     | 28                 | 717               | 0.34 | 0.09 | 0.00  | 11.30        | 73.92         | 14.78        |
| AOD estimates derived<br>from air quality<br>indicators | Global        | 0.19     | 1335               | 203153            | 0.84 | 0.14 | 0.01  | 14.08        | 70.57         | 15.35        |
|                                                         | North America | 0.13     | 433                | 39913             | 0.78 | 0.11 | -0.01 | 6.27         | 76.09         | 17.64        |
|                                                         | South America | 0.11     | 81                 | 18282             | 0.81 | 0.10 | 0.02  | 17.27        | 71.44         | 11.29        |
|                                                         | Europe        | 0.12     | 208                | 61389             | 0.71 | 0.07 | 0.01  | 10.47        | 81.32         | 8.21         |
|                                                         | Asia          | 0.33     | 321                | 62283             | 0.84 | 0.19 | 0.03  | 20.41        | 61.96         | 17.62        |
|                                                         | Africa        | 0.23     | 110                | 19041             | 0.72 | 0.19 | 0.00  | 19.67        | 50.11         | 30.21        |
|                                                         | Australia     | 0.09     | 28                 | 2245              | 0.67 | 0.07 | -0.01 | 2.90         | 83.61         | 13.50        |

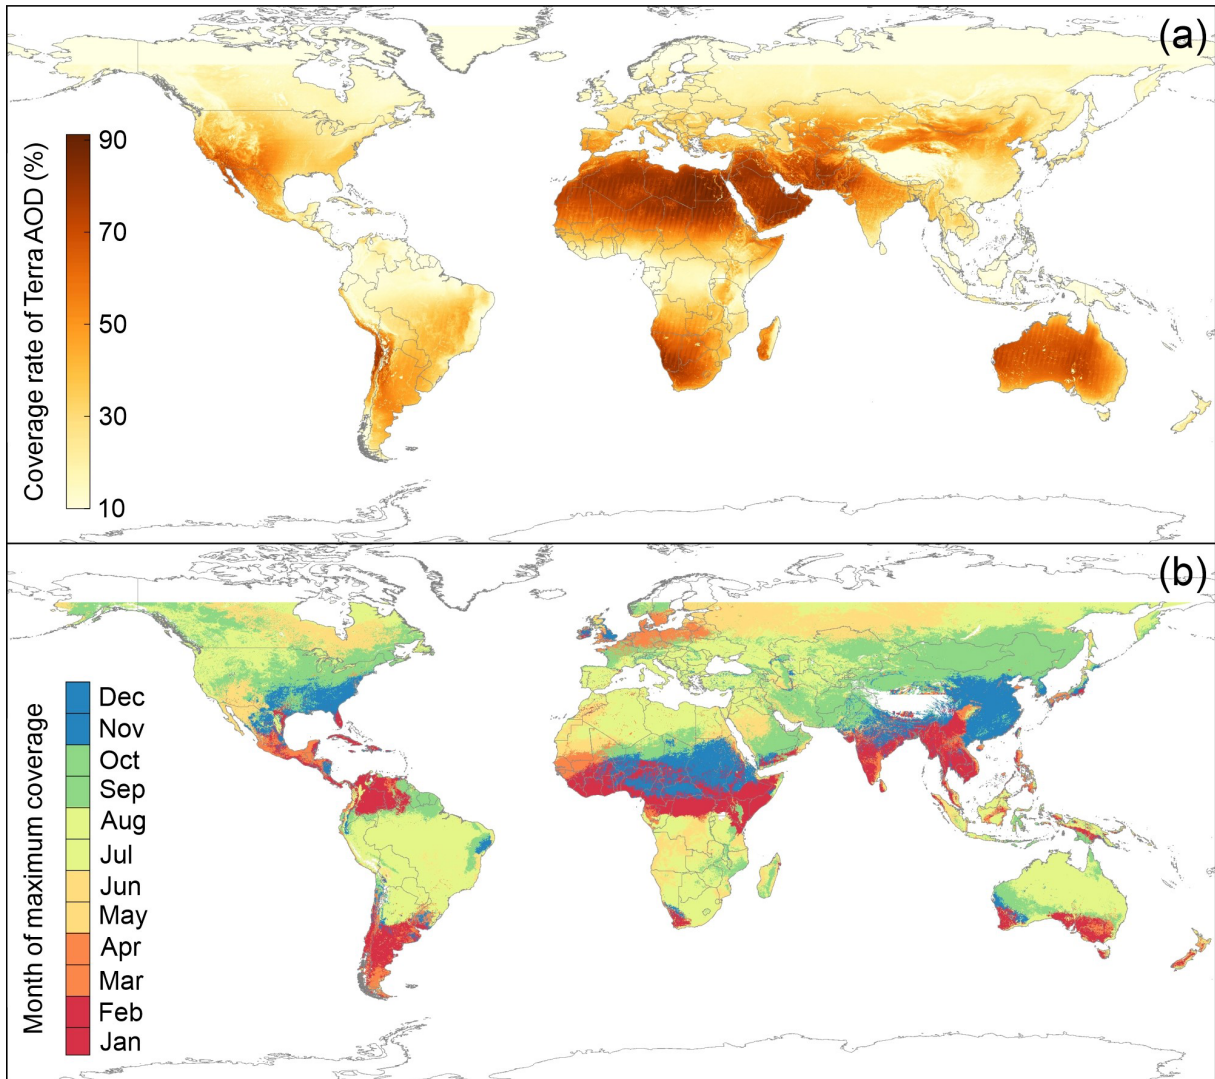

73

74 **Figure S1.** Spatial and temporal variations in AOD data coverage from Terra across the globe during 2000 to 2020.

75

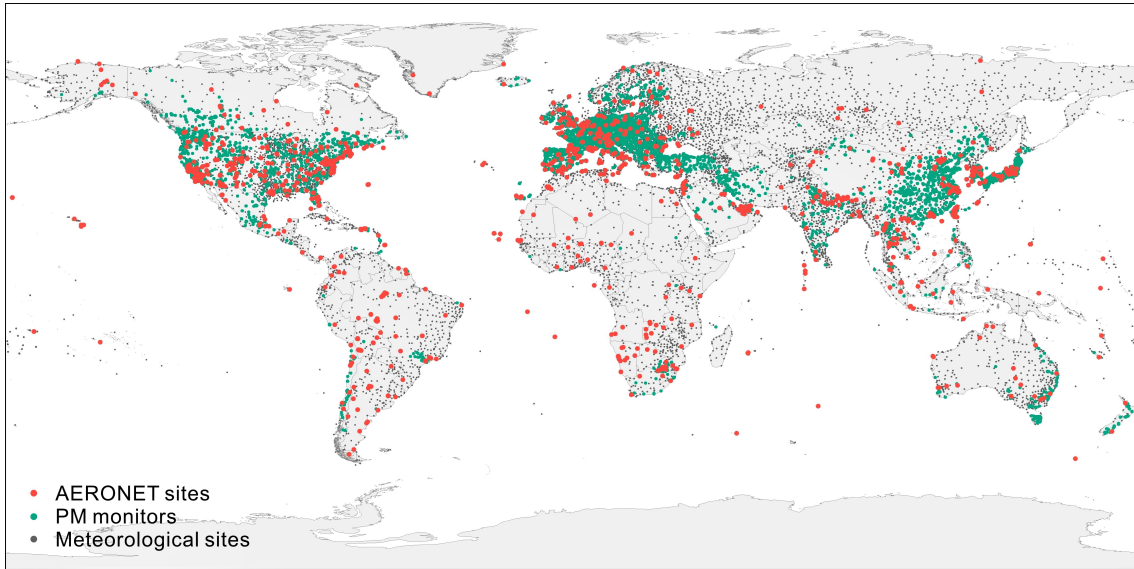

76

77 **Figure S2.** Spatial distribution of ground monitors providing AOD, PM, and atmospheric visibility used in this study across  
78 the globe.

79

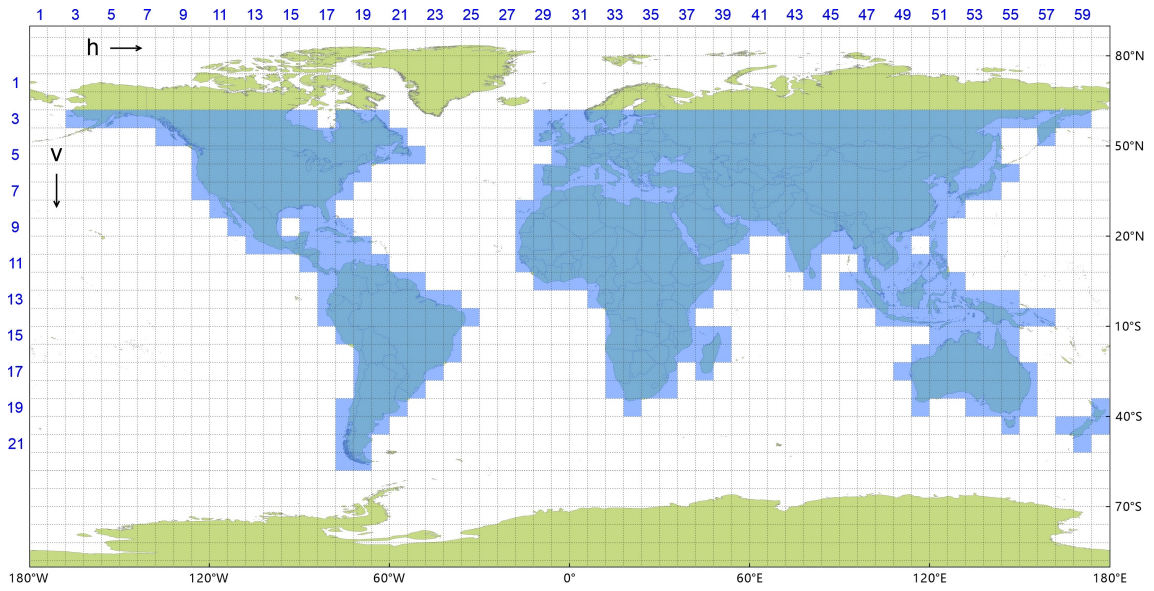

80

81 **Figure S3.** Spatial distribution of data tiles used for global-scale AOD gap-filling.

82

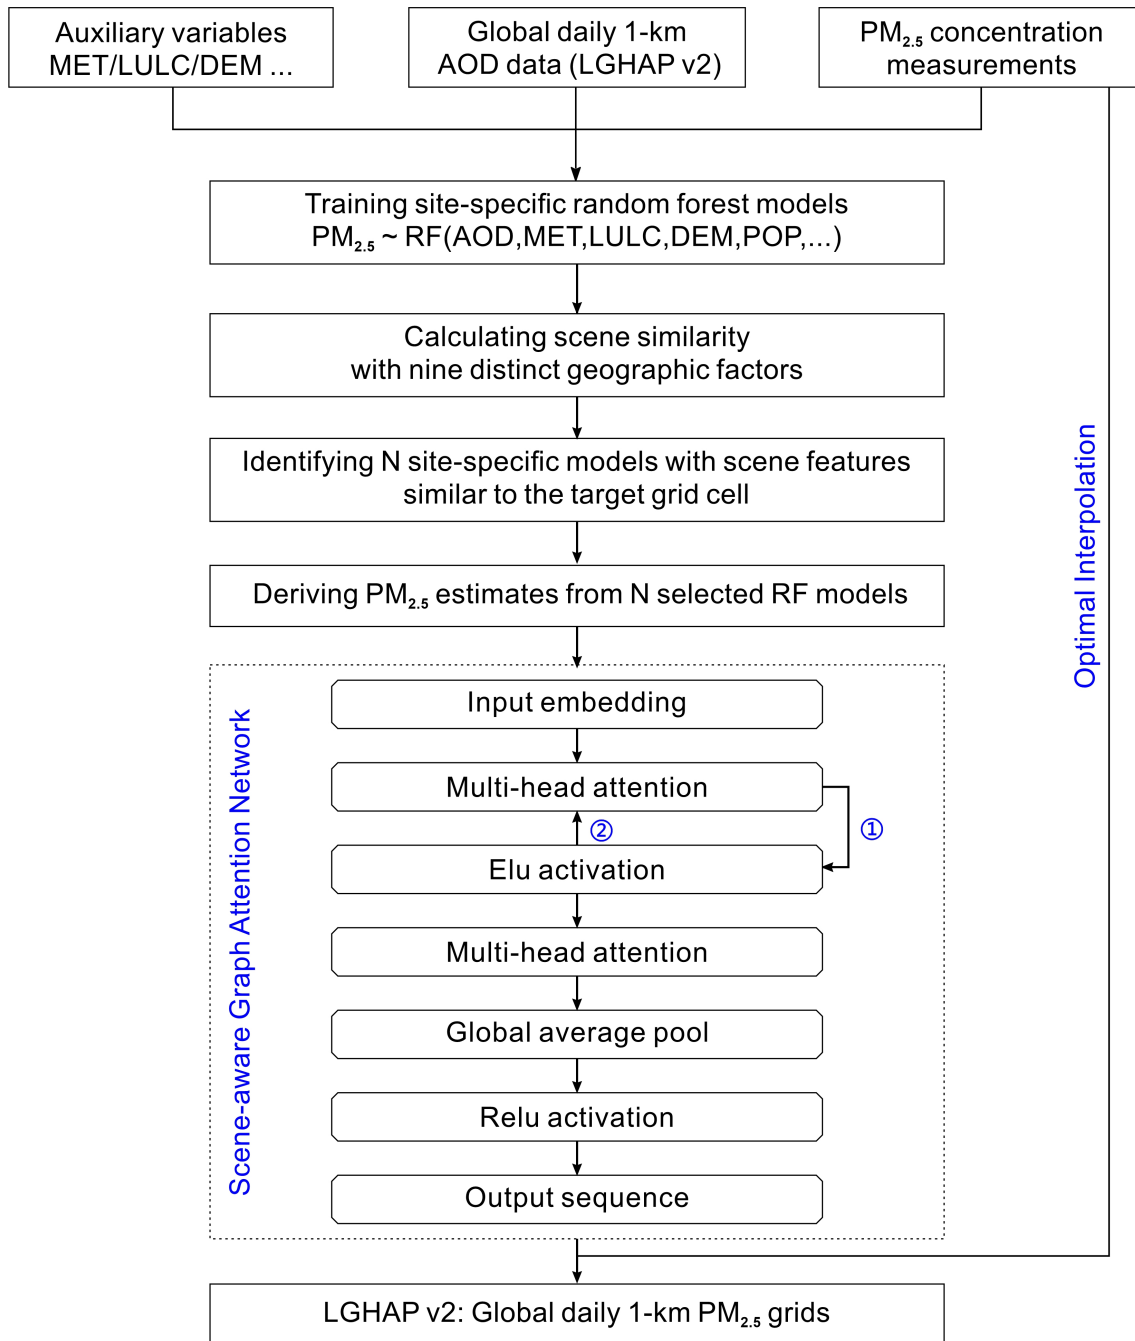

83

84 **Figure S4.** The flow chart of the scene-aware ensemble learning graph attention network (SCAGAT) model.



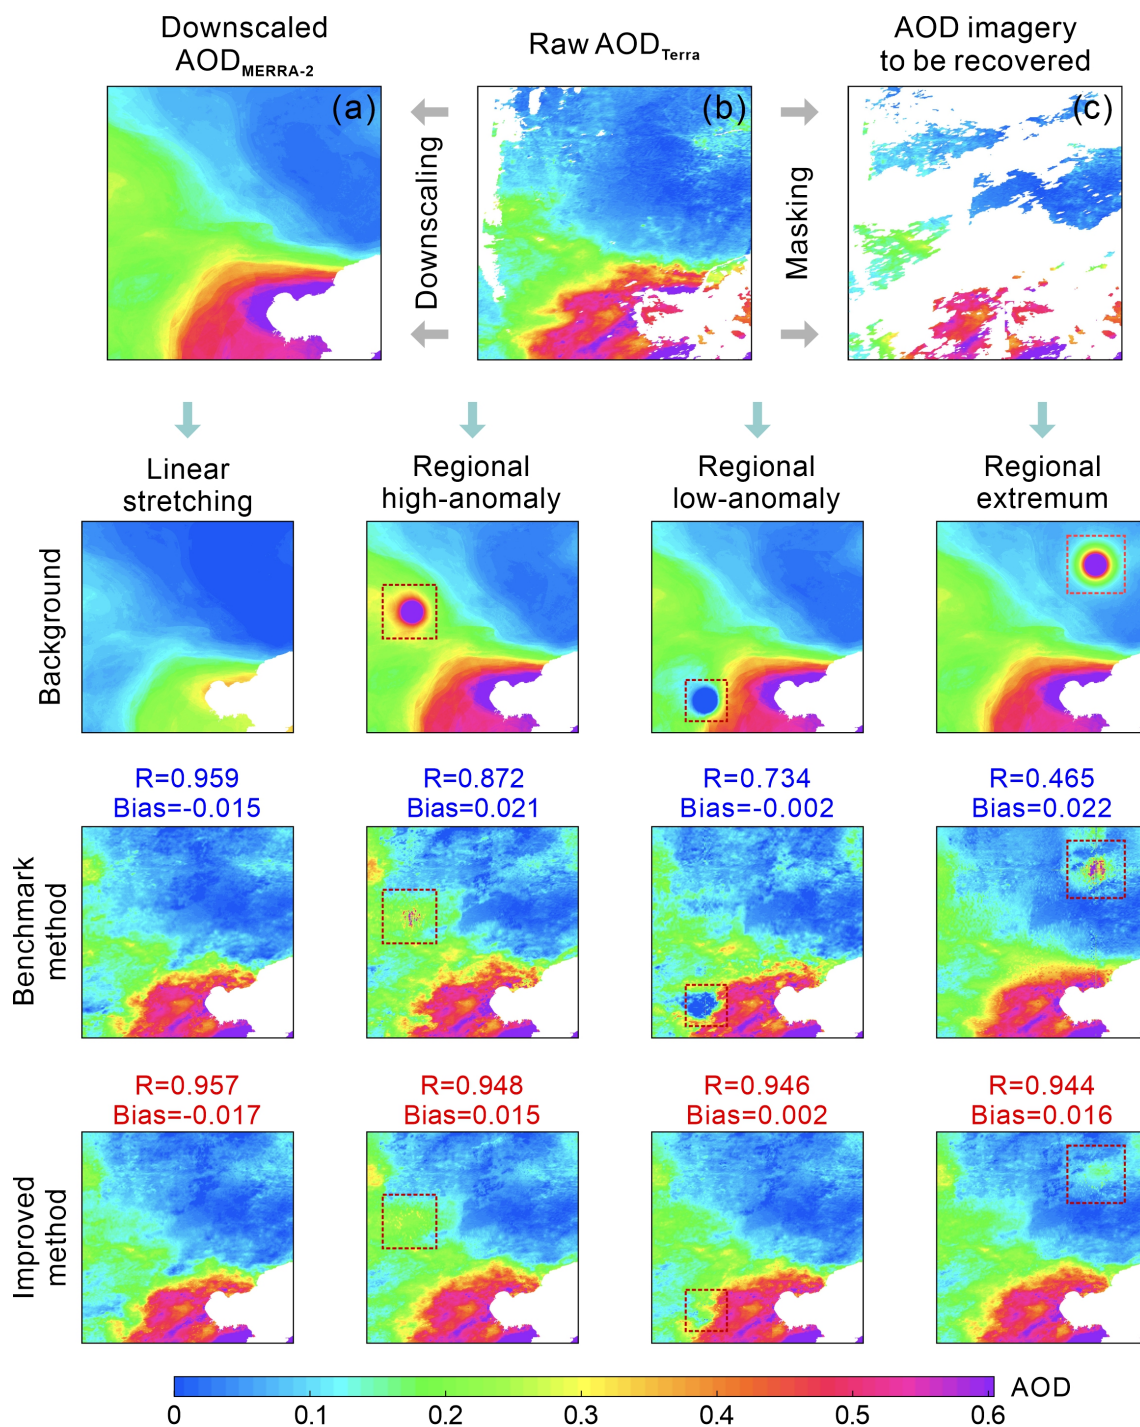

85

86 **Figure S5.** Performance evaluation of the adaptive background information updating module on improving AOD  
 87 reconstruction patterns. Intercomparisons were conducted between the benchmark method (the method developed in Bai et al.  
 88 (2022) to generate LGHAP dataset in China) and the one embedding adaptive background information updating module.  
 89

90 **References**

- 91 Bai, K., Li, K., Ma, M., Li, K., Li, Z., Guo, J., Chang, N.-B., Tan, Z., and Han, D.: LGHAP: the Long-term Gap-free High-  
92 resolution Air Pollutant concentration dataset, derived via tensor-flow-based multimodal data fusion, *Earth Syst Sci*  
93 *Data*, 14, 907–927, <https://doi.org/10.5194/essd-14-907-2022>, 2022.
- 94 Li, K., Bai, K., Ma, M., Guo, J., Li, Z., Wang, G., and Chang, N.-B.: Spatially gap free analysis of aerosol type grids in China:  
95 First retrieval via satellite remote sensing and big data analytics, *ISPRS Journal of Photogrammetry and Remote Sensing*,  
96 193, 45–59, <https://doi.org/10.1016/j.isprsjprs.2022.09.001>, 2022.
- 97
